# Supplementary material
Source: bioRxiv or medRxiv preprint supplement (https://www.biorxiv.org/highwire/filestream/119540/field_highwire_adjunct_files/0/394254-1.pdf)

## SUPPLEMENTARY FIGURES

### Therapeutic potential of TAF1 bromodomains for cancer treatment

Veronica Garcia-Carpizo, Sergio Ruiz-Llorente, Jacinto Sarmentero and Maria J. Barrero

**Supplementary Figure 1. Knock down of TAF1 in KMS11 cells affects proliferation.** (a) TAF1 domains and localization of the shRNAs used in this study (b) Western-blot showing the levels of TAF1 in KMS11 cells transduced with the indicated shRNAs and treated with doxycycline for 4 days. (c) Proliferation curves of the transduced cells treated with vehicle or doxycycline.

**Supplementary Figure 2. Knock down of TAF1 in H1568 cells affects proliferation.** (a) Western-blot showing the levels of TAF1 in H1568 cells transduced with the indicated shRNAs and treated with doxycycline for 7 days. (b) Proliferation curves of the transduced cells treated with vehicle or doxycycline. (c) Crystal violet staining of the transduced cells treated with vehicle or doxycycline for 17 days. Mean, standard deviation and p-value of three replicates is shown.

**Supplementary Figure 3. Knock down of TAF1 in H322 cells affects proliferation.** (a) Western-blot showing the levels of TAF1 in H322 cells transduced with the indicated shRNAs and treated with doxycycline for 5 days. (b) Proliferation curves of the transduced cells treated with vehicle or doxycycline. (c) Crystal violet staining of the transduced cells treated with vehicle or doxycycline for 19 days. Mean, standard deviation and p-value of three replicates is shown. (d) Growth competition assays with cells transduced with gRNAs targeting diverse domains of TAF1 and BRD4 including 5' coding region (5'), bromodomains one and two (BD1 and BD2) and N-terminal kinase domain (NTK).

**Supplementary Figure 4. Knock down of TAF1 in H2291 cells affects proliferation.** (a) Western-blot showing the levels of TAF1 in H1568 cells transduced with the indicated shRNAs and treated with doxycycline for 7 days. (b) Proliferation curves of the transduced cells treated with vehicle or doxycycline. (c) Crystal violet staining of the transduced cells treated with vehicle or doxycycline for 16 days. Mean, standard deviation and p-value of three replicates is shown.

**Supplementary Figure 5. Statistical analysis of growth competition assays in K562.** (a) ANOVA diamond plots showing the adjusted % of inhibition at day 14 for gRNAs grouped into the indicated categories and considering three independent experiments. (b) Tukey-Kramer statistical test results of data shown in a. Pair comparisons found significant at a p-value<0.05 are shown.

**Supplementary Figure 6. Statistical analysis of growth competition assays in H322.** (a) ANOVA diamond plots showing the adjusted % of inhibition at day 14 for gRNAs grouped into the indicated categories and considering three independent experiments. (b) Tukey-Kramer statistical test results of data shown in a. Pair comparisons found significant at a p-value<0.05 are shown.

**Supplementary Figure 7. Changes in cell cycle caused by BAY-299 treatment and TAF1 knock down in H322.** (a) Cell cycle distribution of H322 cells treated with 200nM JQ1 or 2 $\mu$ M BAY-299 or BAY-299N the indicated compounds for 48 and 72 hours (b) Percentage of cells in each phase of the cell cycle. Mean and standard deviation from three replicates are shown. (d) Cell cycle distribution of K562 cells treated with vehicle or doxycycline for 5 days, reseeded at low confluency and harvested at 48 and 72 hours. The mean from three replicates of the percentage of cells in G0/G1 is indicated. \*p<0.05, \*\*p<0.005, \*\*\*p<0.0005.

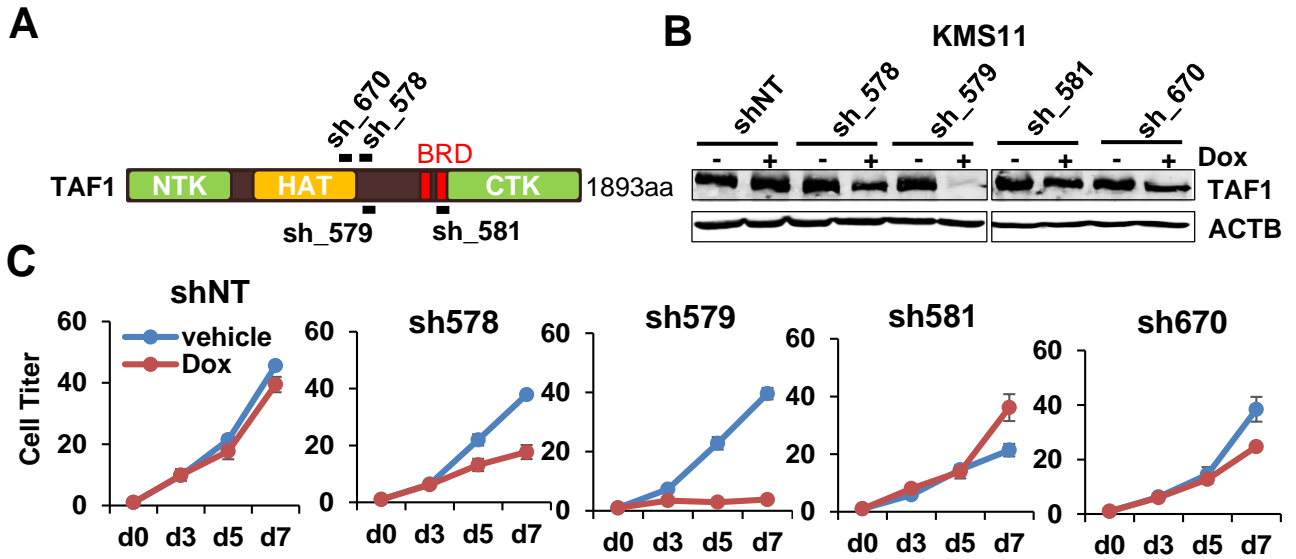

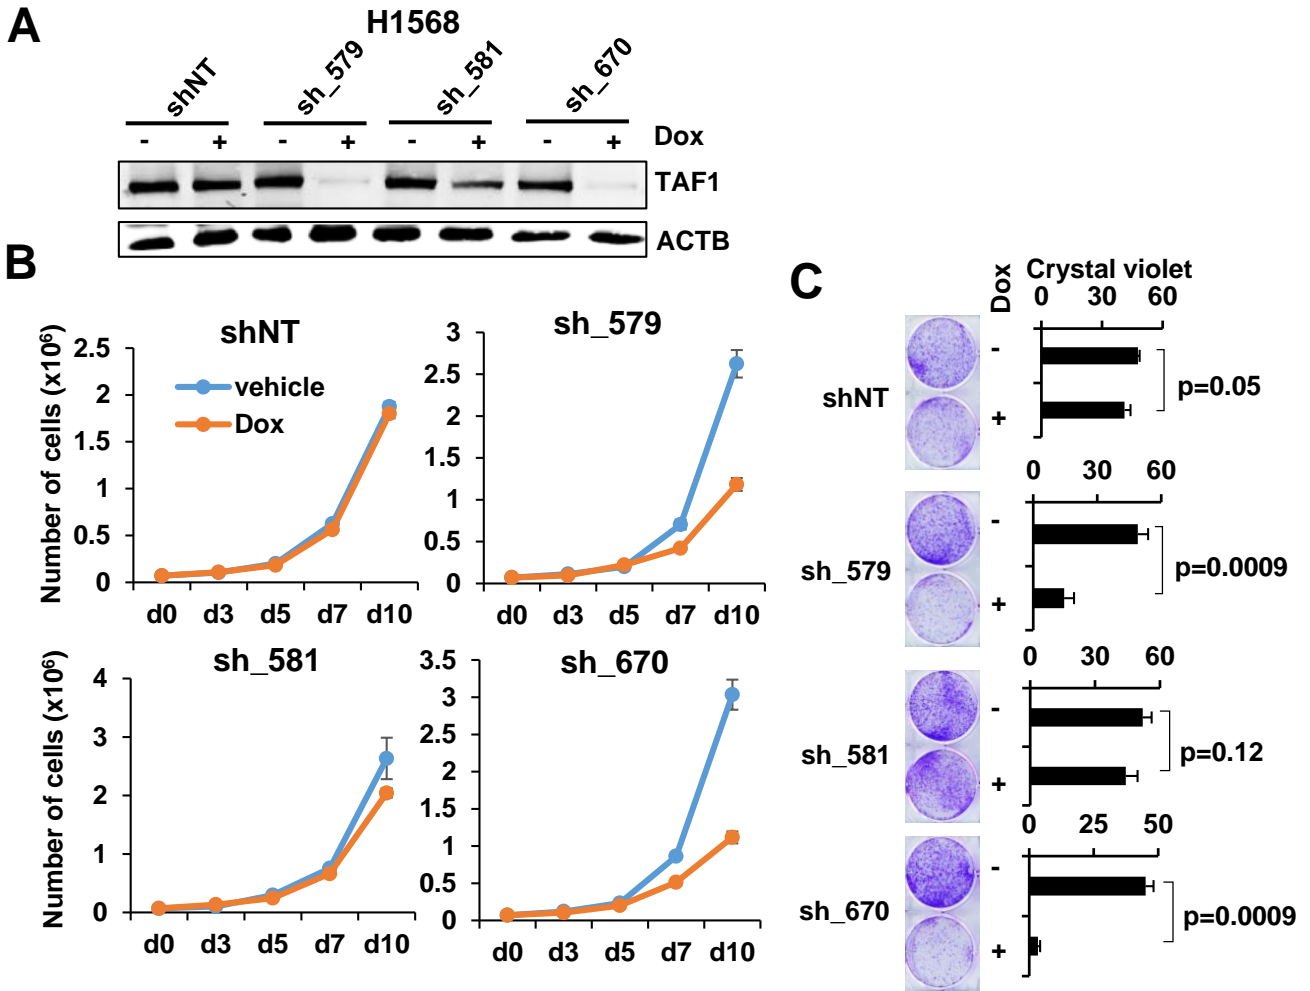

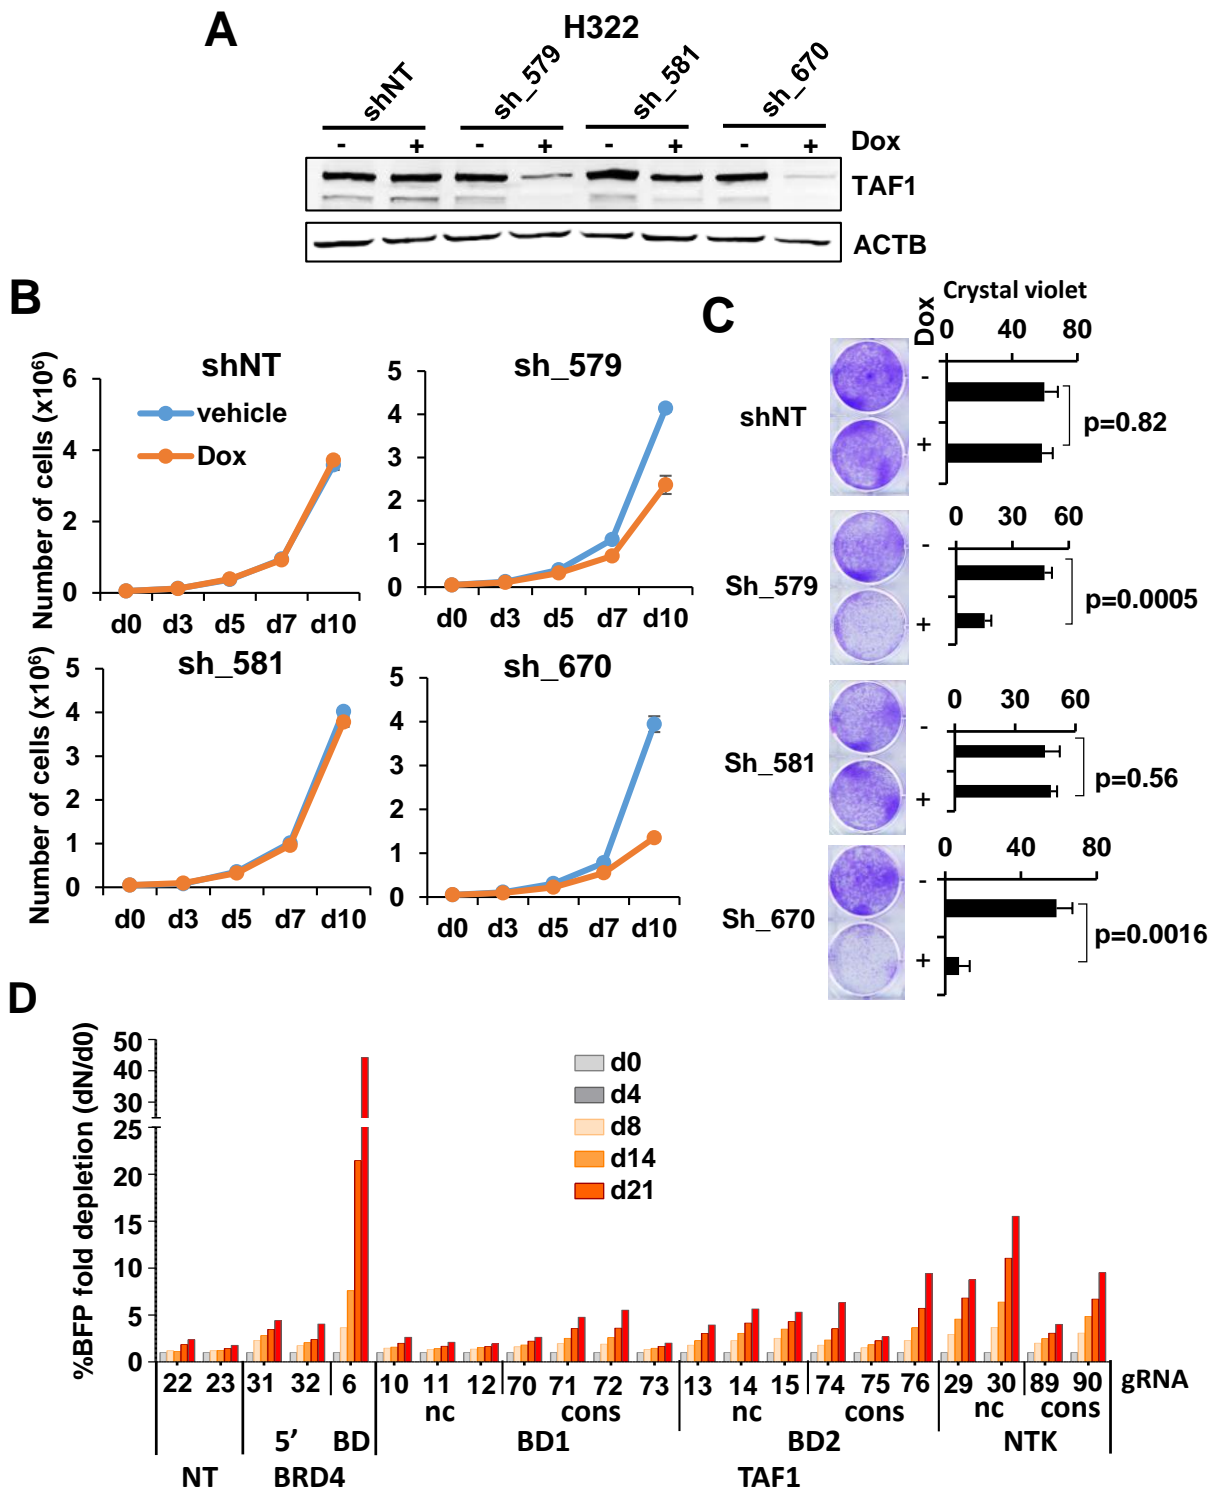

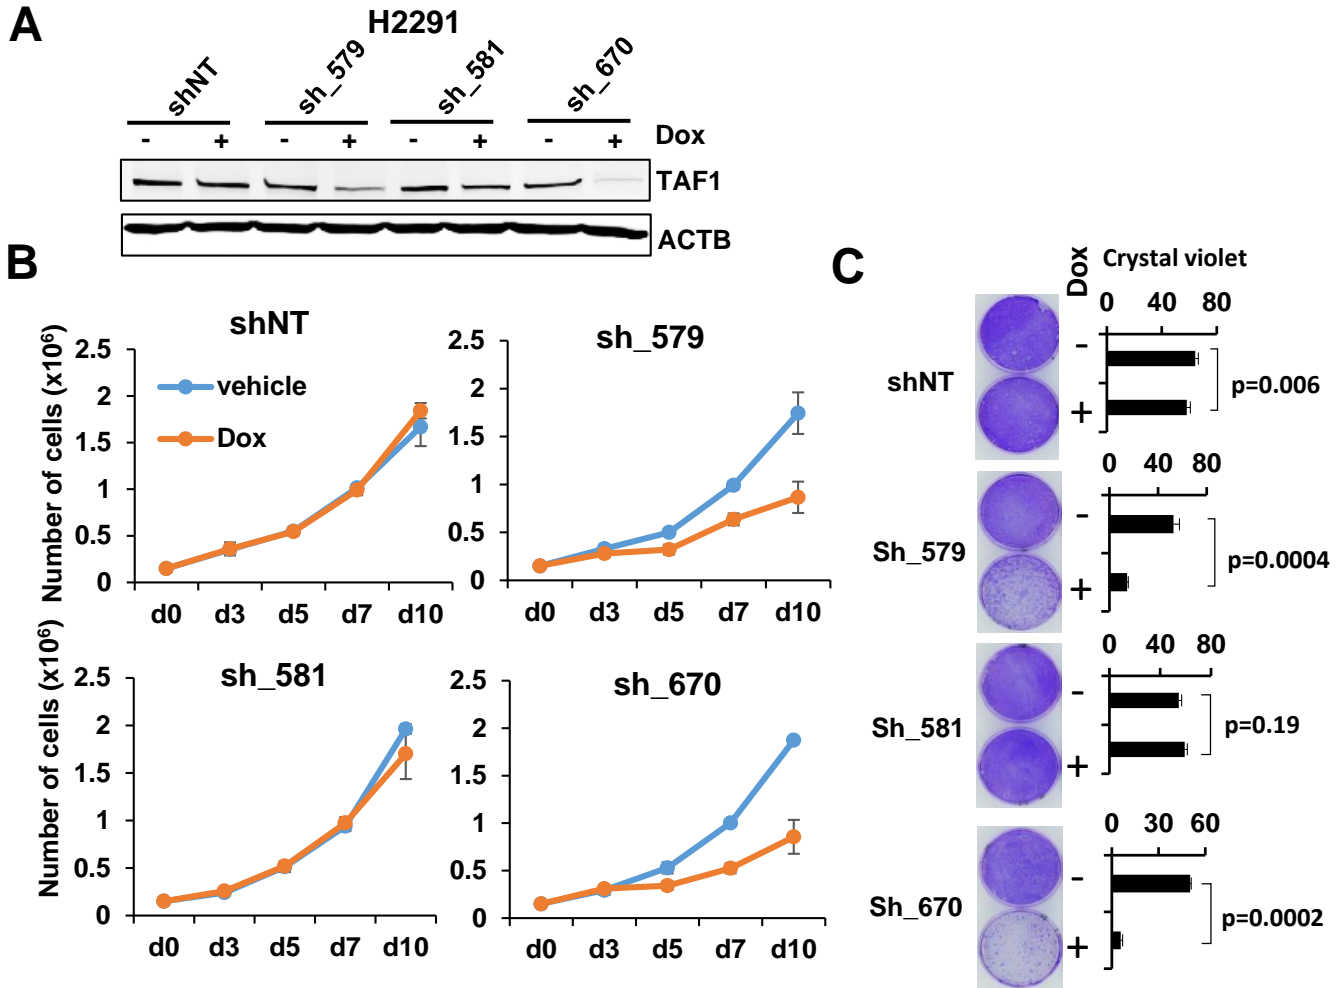

**A**

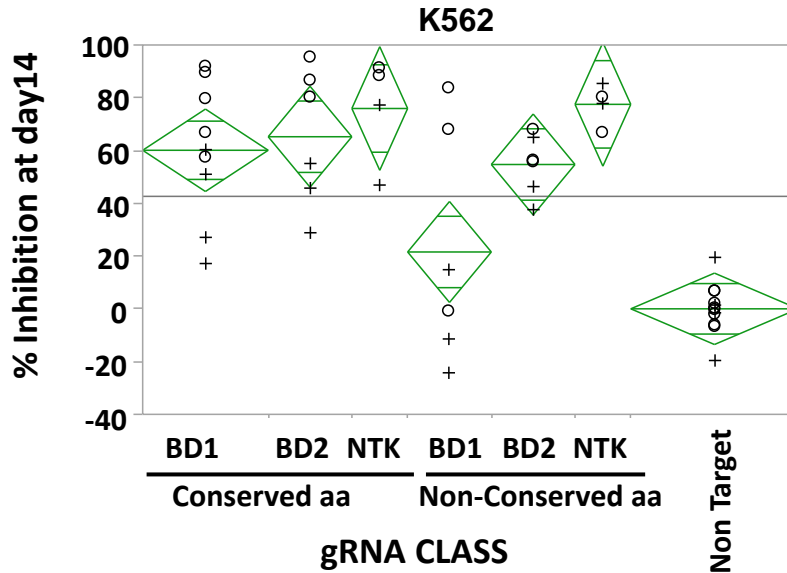

**B**

| Means Comparisons                                |                  |            |             |          |          |          |
|--------------------------------------------------|------------------|------------|-------------|----------|----------|----------|
| Comparisons for all pairs using Tukey-Kramer HSD |                  |            |             |          |          |          |
| Ordered Differences Report                       |                  |            |             |          |          |          |
| Level                                            | - Level          | Difference | Std Err Dif | Lower CL | Upper CL | p-Value  |
| Non-Cons AA, NTK                                 | Non-Target       | 77.49523   | 13.38776    | 35.9514  | 119.0390 | <.0001 * |
| Cons AA, NTK                                     | Non-Target       | 75.92203   | 13.38776    | 34.3782  | 117.4658 | <.0001 * |
| Cons AA, BRD2                                    | Non-Target       | 65.22455   | 11.59414    | 29.2466  | 101.2025 | <.0001 * |
| Cons AA, BRD1                                    | Non-Target       | 60.08754   | 10.22507    | 28.3579  | 91.8172  | <.0001 * |
| Non-Cons AA, NTK                                 | Non-Cons AA, BRD | 55.94939   | 14.96797    | 9.5020   | 102.3968 | 0.0096 * |
| Non-Cons AA, BRD                                 | Non-Target       | 54.70082   | 11.59414    | 18.7228  | 90.6788  | 0.0005 * |
| Cons AA, NTK                                     | Non-Cons AA, BRD | 54.37619   | 14.96797    | 7.9288   | 100.8236 | 0.0128 * |
| Cons AA, BRD2                                    | Non-Cons AA, BRD | 43.67871   | 13.38776    | 2.1349   | 85.2225  | 0.0337 * |
| Cons AA, BRD1                                    | Non-Cons AA, BRD | 38.54170   | 12.22130    | 0.6176   | 76.4658  | 0.0442 * |

**A**

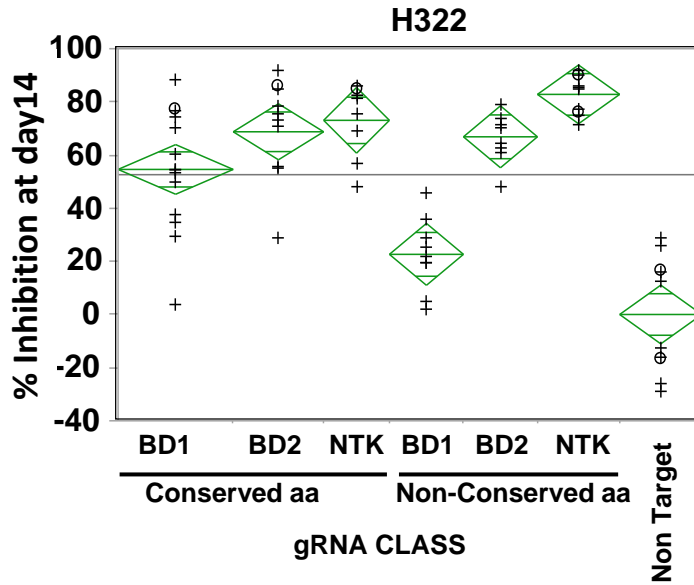

**B**

| Means Comparisons                                |                  |            |             |          |          |          |
|--------------------------------------------------|------------------|------------|-------------|----------|----------|----------|
| Comparisons for all pairs using Tukey-Kramer HSD |                  |            |             |          |          |          |
| Ordered Differences Report                       |                  |            |             |          |          |          |
| Level                                            | - Level          | Difference | Std Err Dif | Lower CL | Upper CL | p-Value  |
| Non-Cons AA, NTK                                 | Non-Target       | 82.81181   | 7.832423    | 58.3179  | 107.3057 | <.0001 * |
| Cons AA, NTK                                     | Non-Target       | 73.05188   | 8.307539    | 47.0721  | 99.0316  | <.0001 * |
| Cons AA, BRD2                                    | Non-Target       | 68.74345   | 7.652343    | 44.8127  | 92.6742  | <.0001 * |
| Non-Cons AA, BRD                                 | Non-Target       | 66.85186   | 8.047050    | 41.6867  | 92.0170  | <.0001 * |
| Non-Cons AA, NTK                                 | Non-Cons AA, BRD | 60.18588   | 8.047050    | 35.0207  | 85.3510  | <.0001 * |
| Cons AA, BRD1                                    | Non-Target       | 54.57846   | 7.251415    | 31.9015  | 77.2554  | <.0001 * |
| UNST                                             | Non-Target       | 51.96897   | 9.592720    | 21.9701  | 81.9678  | <.0001 * |
| Cons AA, NTK                                     | Non-Cons AA, BRD | 50.42595   | 8.510192    | 23.8125  | 77.0394  | <.0001 * |
| Cons AA, BRD2                                    | Non-Cons AA, BRD | 46.11752   | 7.871881    | 21.5002  | 70.7349  | <.0001 * |
| Non-Cons AA, BRD                                 | Non-Cons AA, BRD | 44.22593   | 8.256099    | 18.4071  | 70.0448  | <.0001 * |
| Cons AA, BRD1                                    | Non-Cons AA, BRD | 31.95253   | 7.482725    | 8.5522   | 55.3529  | 0.0015 * |
| Non-Cons AA, NTK                                 | Cons AA, BRD1    | 28.23334   | 7.251415    | 5.5564   | 50.9103  | 0.0053*  |

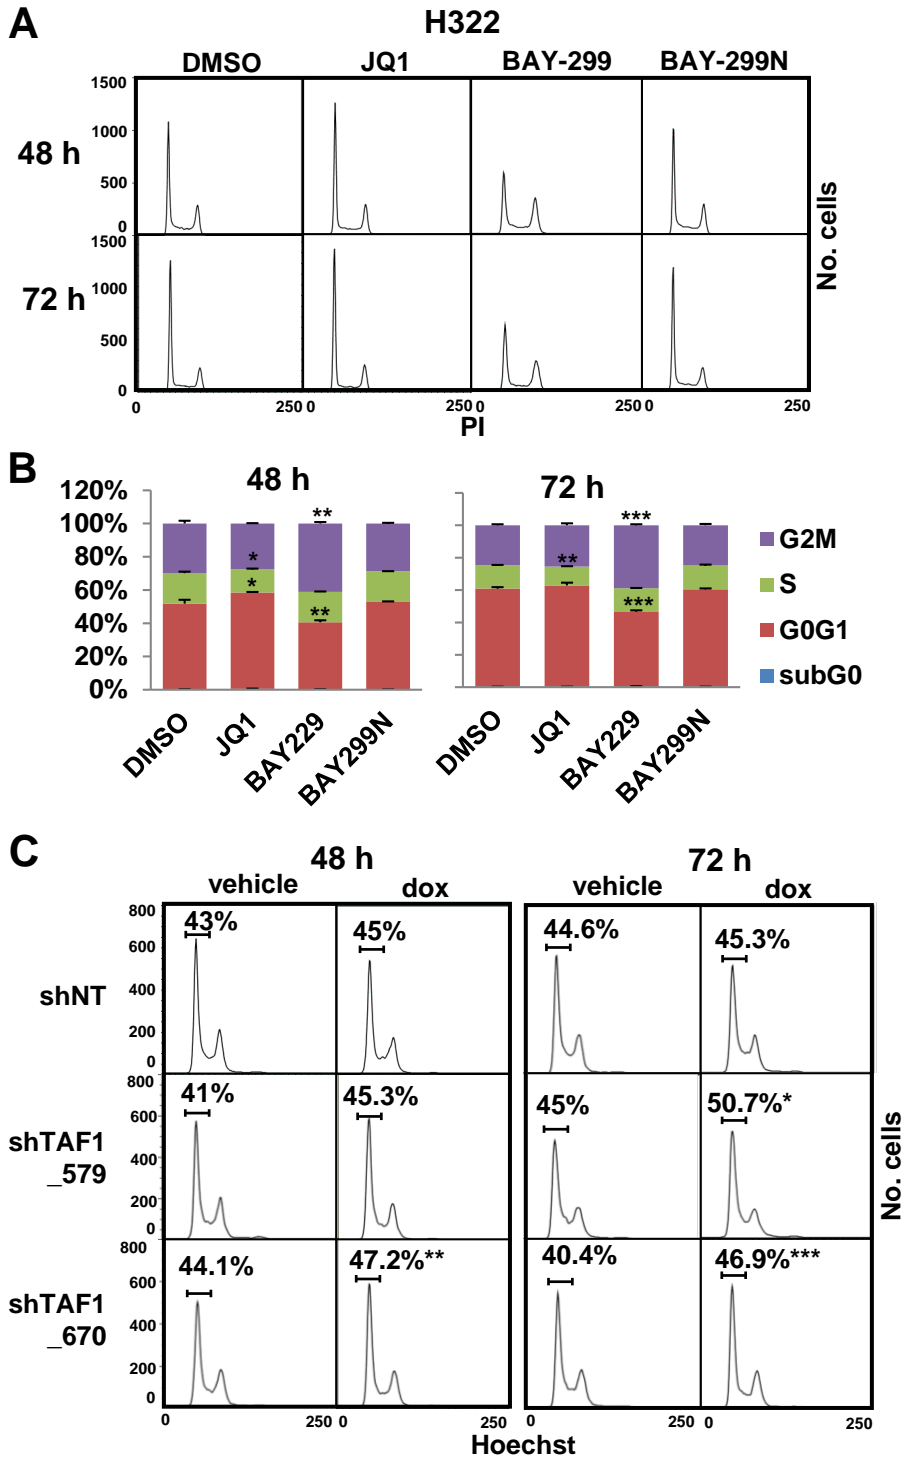

Supplement: Supplementary file [file 394254-1.pdf]
